# Supplementary material
Source: PubMed Central journal article supplement (PMC2268165)

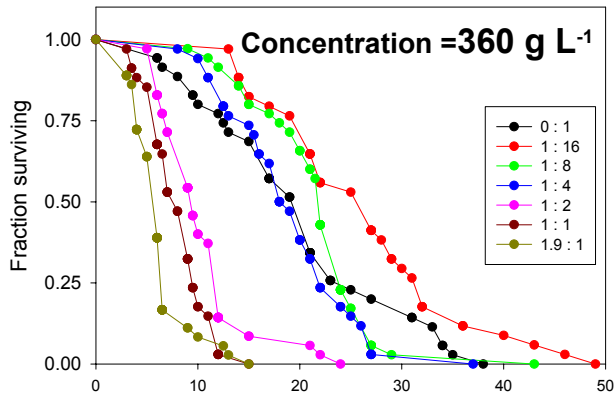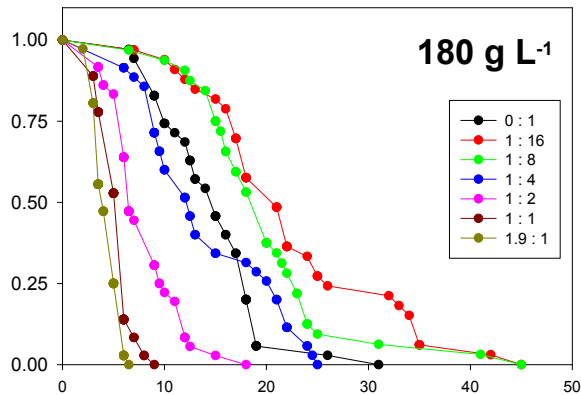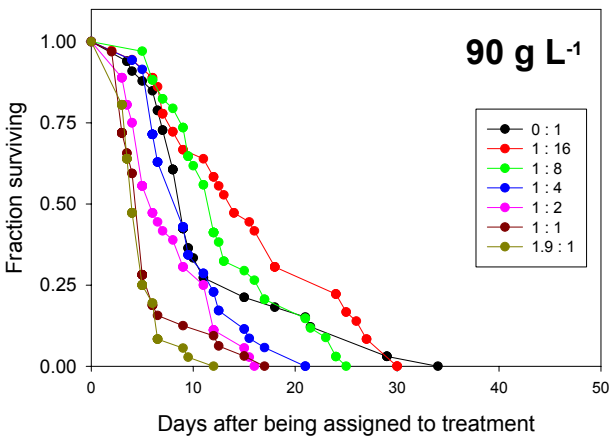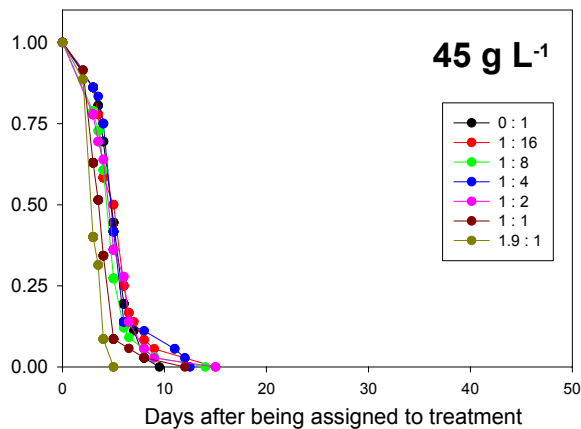

Supplement: supp_0710787105_10787Fig6.pdf [file supp_0710787105_10787Fig6.pdf]

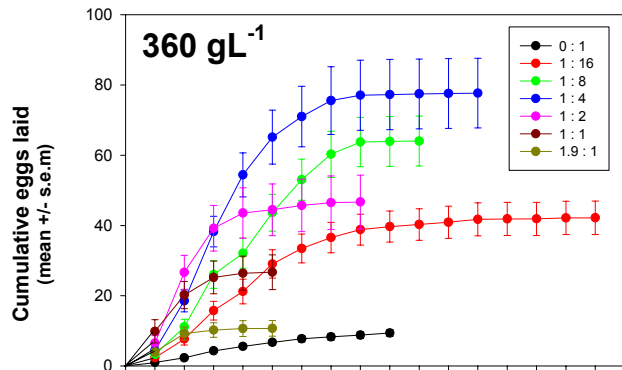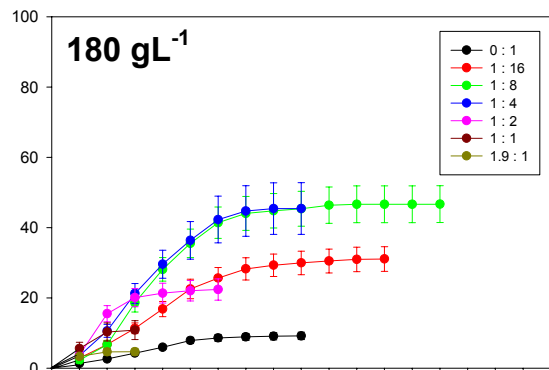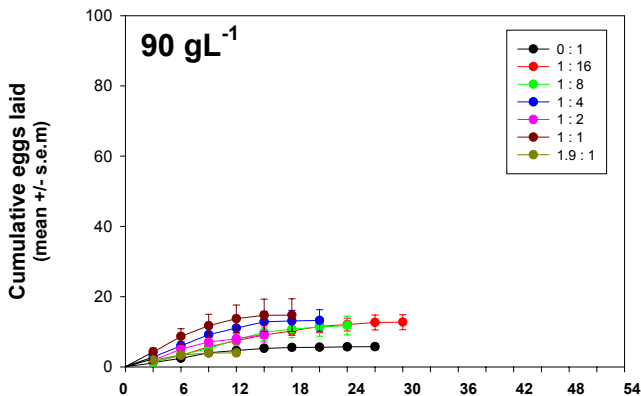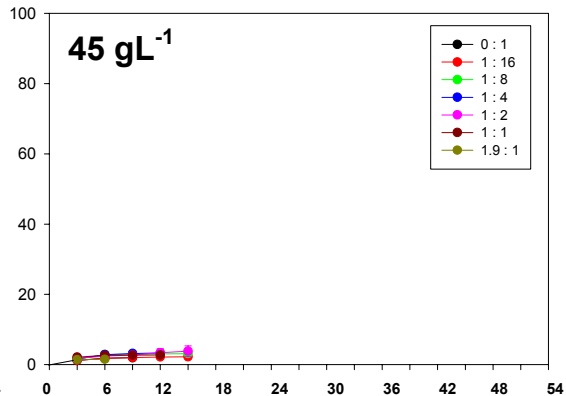

Days after dietary treatment

Supplement: supp_0710787105_10787Fig7.pdf [file supp_0710787105_10787Fig7.pdf]

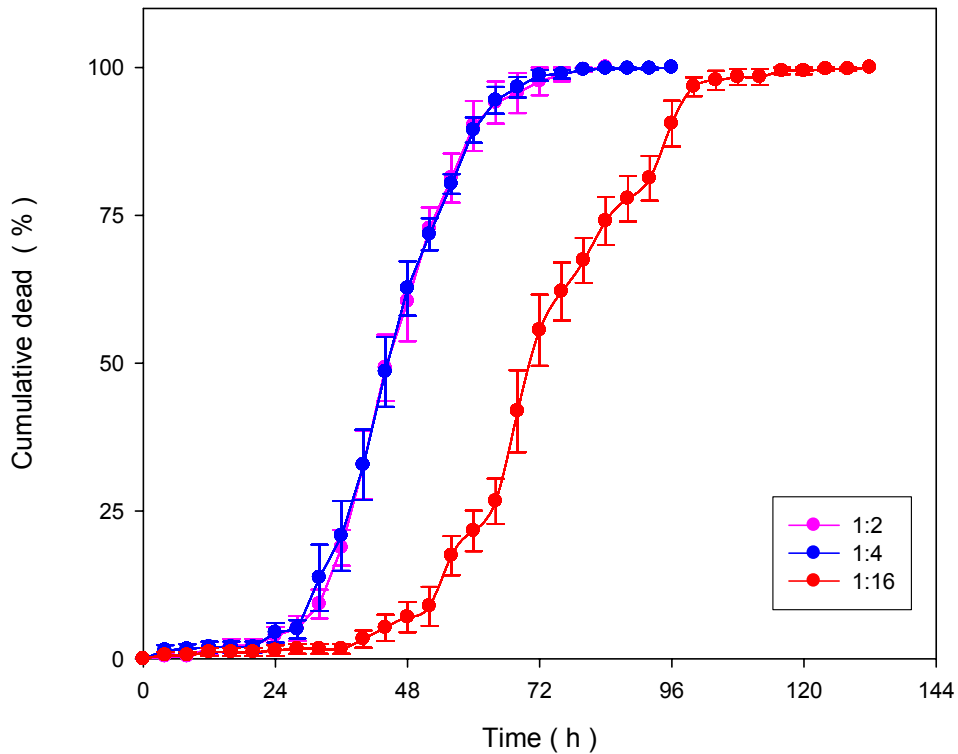

Supplement: supp_0710787105_10787Fig8.pdf [file supp_0710787105_10787Fig8.pdf]
